1 **Title:**

2 Do El Niño events beget generations of reproductively deficient adults?

3 **List of authors:**

4 Santiago Ortega<sup>1,2</sup>

5 Cristina Rodríguez<sup>2</sup>

6 Hugh Drummond<sup>2</sup>

7 **Institutional affiliations:**

8 <sup>1</sup> Posgrado en Ciencias Biológicas, Universidad Nacional Autónoma de México

9 <sup>2</sup> Departamento de Ecología Evolutiva, Instituto de Ecología, Universidad Nacional  
10 Autónoma de México, 04510, Ciudad de México, México

11 **Correspondence author:**

12 Santiago Ortega

13 E-mail: [zanntOrtega@gmail.com](mailto:zanntOrtega@gmail.com)

14 Phone number: + 52 (55) 5622-9007

15 Mailing address: Laboratorio de Conducta Animal, Instituto de Ecología, Universidad

16 Nacional Autónoma de México, A.P. 70-275. 04510, Ciudad de México, México.

17 **Abstract**

18 1. Warm ocean waters during El Niño events deplete primary productivity, with cascading  
19 effects through the food chain that profoundly affect many marine and terrestrial species,  
20 commonly increasing adult mortality and offspring starvation. With global warming, events  
21 will double and increasingly threaten the depletion or extinction of some animal  
22 populations.

23 2. Because adverse environments experienced during infancy generally induce reproductive  
24 deficits in adulthood, El Niño events are also expected to affect animals born during them,  
25 engendering generations of adults with reduced reproductive potential and exacerbating  
26 demographic impacts.

27 3. We made the first test of this idea, using the blue-footed booby, a piscivorous apex  
28 predator of the eastern tropical Pacific Ocean. Surprisingly, detailed monitoring of 18  
29 generations over a 27-year period detected no deficits in the annual breeding success,  
30 offspring viability, lifespan or lifetime reproductive success of generations of adults born  
31 during El Niño years.

32 4. These results testify to remarkable developmental resilience extending across the  
33 lifespan. However, there was evidence that this resilience was supported by two  
34 mechanisms of quality control of adult generations from El Niño years.

35 5. First, viability selection on nestlings and fledglings was more severe for El Niño birth  
36 cohorts than ordinary cohorts.

37 6. Second, in El Niño years, adult boobies self-selected for breeding. There was no  
38 increase in the proportional representation of either high quality breeders or breeders in  
39 their peak years (middle-age), but there was an increase in old-young adult pairings, which  
40 in this population produce the most viable fledglings.

41 7. The blue-footed booby appears to be immune to the expected developmental impact of  
42 El Niño on the reproductive value of adult generations. The susceptibilities and resilience  
43 of other species need to be explored, to better predict the demographic impacts of this  
44 accelerating climatic oscillation.

45 **Keywords:**

46 Adverse environments, cohort effects, resilience, lifetime reproductive success, El Niño  
47 Southern Oscillation, viability selection, self-selection

48

49

## 50 **Introduction**

51 With global warming, our planet's most dramatic short-term climate oscillation, El Niño  
52 Southern Oscillation (ENSO), is predicted to increase in intensity, with extreme events  
53 doubling in frequency in the near future (Cai et al., 2014; Ham, 2018; Wang et al., 2017).  
54 This raises urgent questions about the ability of animal populations of the eastern Pacific  
55 Ocean to withstand its accelerating demographic impacts. During El Niño events, separated  
56 by 2-7 year intervals (Zhang & Zhao, 2015), warm ocean waters deplete primary  
57 productivity, with broadly deleterious consequences throughout the food chain. Impacts on  
58 marine vertebrates in the reproductive season, especially seabirds, include physiological  
59 suppression and delay (Guerra, Fitzpatrick, Aguilar, & Venables, 1988), reduced adult  
60 survival and reproduction, nest abandonment, reduced offspring growth and survival,  
61 population decline and changes in distribution (Hays, 1986; Hodder & Graybill, 1985; Le  
62 Boeuf & Reiter, 1991; Tovar, Guillen, & Cabrera, 1987; Valle, Cruz, Cruz, Merlen, &  
63 Coulter, 1987); with increased frequency of warm water events limiting population  
64 recovery and increasing risk of extinction (Vargas, Harrison, Rea, & Macdonald, 2006;  
65 Vargas et al., 2007).

66 Another likely consequence, with demographic implications, is diminished reproductive  
67 value of adults born in El Niño years. No study has addressed the possibility of El Niño  
68 cohort effects, but numerous experiments have shown that early-life environmental  
69 conditions usually have developmental effects on physiological, behavioural,  
70 morphological and life history traits of vertebrates during adulthood (Grace, Martin-  
71 Gousset, & Angelier, 2017; Haywood & Perrins, 1992; Mumme, Bowman, Pruett, &  
72 Fitzpatrick, 2015; Nettle et al., 2017; Plard et al., 2015). Furthermore, in mammals, natural

73 early-life adversity has been linked to harmful consequences on fitness components and  
74 senescence rates (e.g. Nussey, Kruuk, Morris, & Clutton-brock, 2007; Pigeon, Festa-  
75 Bianchet, & Pelletier, 2017; Plard et al., 2015), and in 5 of 9 bird species studied in nature,  
76 adults that experienced poor weather, habitats, prey availability, parental care or late  
77 fledging in the natal year showed reduced lifetime reproductive success (review in  
78 Drummond & Ancona, 2015). There is also experimental and descriptive evidence for  
79 intergenerational effects: negative impacts of nutritional and social stress in infancy on the  
80 quality and viability of the infant's eventual offspring (Burton & Metcalfe, 2014;  
81 Drummond & Rodríguez, 2013; Naguib & Gil, 2005).

82 These findings raise the expectation that in many species, generations of adults from El  
83 Niño birth cohorts will show survival or fitness deficits or produce offspring of low quality,  
84 at some stage of their lifetime. However, in wild animals such effects are sometimes  
85 mitigated in one or both sexes by simple developmental resilience or by making life-history  
86 adjustments that seemingly neutralize fitness penalties (e.g. Ancona & Drummond, 2013;  
87 Cartwright, Nicoll, Jones, Tatayah, & Norris, 2014; Dmitriew & Rowe, 2007; Douhard et  
88 al., 2016). Thus, in some species, adults exposed to warm ocean waters in their natal year  
89 might sidestep impacts on their lifetime reproductive success, although complete evasion of  
90 fitness impacts of early-life environmental stress has not been documented for any long-  
91 lived animal.

92 Our case study of a population of blue-footed boobies (*Sula nebouxii*) tested for effects of  
93 ENSO conditions (mean water temperature in the 8-month breeding season) in the natal  
94 year on the quality of adult generations by comparing the lifetime reproductive  
95 performance of recruits from 18 birth cohorts. This long-lived (up to 25 years), socially

96 monogamous apex predator of the eastern tropical Pacific Ocean lays clutches of 1-3 eggs,  
97 but often raises fewer chicks when underfeeding triggers siblicidal brood reduction. When  
98 an El Niño event depletes populations of its fish prey, circulating corticosterone increases  
99 in females (Wingfield, Ramos-Fernandez, Nuñez-de la Mora, & Drummond, 1999),  
100 mortality of young adults increases, fewer boobies breed, breeding is delayed, clutch and  
101 brood sizes are smaller, hatching fledging and breeding success decline, and nestlings grow  
102 more slowly (Ancona, Sánchez-Colón, Rodríguez, & Drummond, 2011; Kiere &  
103 Drummond, 2016; Oro, Torres, Rodríguez, & Drummond, 2010). Nonetheless, previous  
104 analysis of the first ten years of life suggested that male and female recruits from El Niño  
105 birth cohorts largely escape developmental impacts: they recruited at an earlier age, bred  
106 less frequently (skipped more years) and matched the survivorship and accumulated  
107 breeding success (production of fledglings) of recruits born under favourable cold water  
108 conditions (Ancona & Drummond, 2013). However, these observations do not demonstrate  
109 full equivalence to recruits from cold-water cohorts because fitness penalties could  
110 manifest after the first 10 years or in other fitness components such as rate of reproductive  
111 senescence, adult lifespan or offspring quality. To determine whether El Niño events  
112 impact the reproductive value of adult generations, fitness accounting across the whole  
113 lifespan of recruits is required. This was possible for the focal population because, with rare  
114 exceptions, fledglings nest for the first time (mostly at ages 2-5 years) close to where they  
115 hatched, then nest close to their first nest site during the rest of their lives (Kim, Torres,  
116 Domínguez, & Drummond, 2007).

117 We also tested for two largely unstudied filtering processes which theoretically could  
118 buttress populations against demographic impacts of adverse natal environments and mask

119 their developmental impacts. The first is self-selection for breeding in adverse conditions  
120 by high quality breeders able to confer their own quality on offspring. In support of this  
121 idea, there is some evidence that in stressful circumstances animals that are in poor  
122 condition, very young or very old may skip breeding, trading reproduction for survival in  
123 the service of lifetime reproductive success (Cubaynes, Doherty, Schreiber, Gimenez, & Jr,  
124 2010; Goutte, Kriloff, Weimerskirch, & Chastel, 2011; Skjaeraasen et al., 2012), and  
125 resulting in an increase in the proportion of high quality individuals among breeders. The  
126 second is increased viability selection in adverse conditions: differential survival and  
127 recruitment into the breeding population of high quality offspring (cf. Garratt et al., 2015;  
128 Mojica & Kelly, 2010).

129

130

131 **Materials and methods**

132 *Study population and data collection*

133 Demographic data were collected between 1989 and 2018 during lifelong annual  
134 monitoring of individual blue-footed boobies (*Sula nebouxii*) on Isla Isabel, Nayarit  
135 (21°53'N, 105°54'W), off the Pacific coast of Mexico (Drummond, Torres, & Krishnan,  
136 2003; Kim et al., 2007).

137 Breeders were individually identified by bands fitted at fledging. Throughout each  
138 reproductive season (roughly February through July) all pairs in two study areas were  
139 monitored by recording their nest contents every 3-6 days through fledging (details in  
140 Drummond et al., 2003). Nests in the study area and within 20 m of its borders, which  
141 correspond with natural borders of the colony, are too conspicuous on the beach and forest  
142 floor to escape detection by the team of two monitors (Drummond & Rodríguez, 2015).  
143 This monitoring protocol allowed detection of nearly all recruitment and breeding of the  
144 focal fledglings through 2018.

145 For all analyses of breeders, samples included all members of the 18 birth cohorts (1989-  
146 2009) that recruited by age 6 years (the age by which 87% of fledglings recruit), thereby  
147 excluding individuals whose early nesting may have been missed. We analysed annual  
148 breeding success (number of 70-d old fledglings produced, regardless of brood size),  
149 fledgling viability (proportion of fledglings that recruited), adult lifespan (age at the last  
150 observed breeding), lifetime reproductive success (total recruits produced), fledging  
151 success (proportion of nestlings that managed to fledge), and recruitment (whether an  
152 individual was resighted as a breeder; 1-0 variable), separately for females and males



153 because pair mates are not statistically independent. Because nestlings and fledglings are  
154 not sexed until they return to the colony as breeders, the analyses of fledging success and  
155 recruitment were not separated by sex.

156 The sample for analysis of annual breeding success included all breeders from the 18  
157 cohorts (2143 male and 1893 female boobies); the sample for analysis of fledgling viability  
158 included the offspring produced by all breeders from those cohorts that fledged at least one  
159 chick at any age (1646 male and 1329 female breeders), and excluded fledglings born after  
160 2013 because their recruitment could not be adequately scored (they were monitored for  
161 less than 6 years). The sample for analyses of adult lifespan and lifetime reproductive  
162 success included only the 1319 male and 1105 female breeders that died before 2013,  
163 allowing each of their fledglings at least 6 years to recruit during annual monitoring. Death  
164 was assumed when a breeder was absent during three consecutive breeding seasons; in the  
165 cohorts of 1989-1995, only 5-6% of breeders were ever resighted after three consecutive  
166 absences. For males and females, respectively, ages of first reproduction (mean  $\pm$  SD) were  
167  $4.14 \pm 0.95$  and  $3.54 \pm 0.98$  years, and adult lifespans were  $8.05 \pm 3.49$  and  $8.02 \pm 3.99$   
168 years (range 1 to 22 years for both sexes).

169 Self-selection for breeding in warm water conditions was tested in the 4036 males and  
170 females of the 18 cohorts that recruited by looking for increase in the proportional  
171 representation of individuals of above average quality, favourable ages (10-14 years) or  
172 from cool water (La Niña) natal years (lest this confer any long-term benefit). Individual  
173 quality was expressed as the mean of all z-normal standardized annual breeding success  
174 values (fledglings produced) over each individual's lifespan.

175 Increased viability selection on warm water cohorts was tested by analysing the proportion  
176 of nestlings that managed to fledge each year and the recruitment probability of each year's  
177 fledglings. For fledging success, we used data from one-, two-, and three- chick broods  
178 (sample sizes: 7630, 6975, and 1326, respectively) reared between 1989 and 2018; for  
179 recruitment, we included all 10604 fledglings produced between 1989 and 2013 for which  
180 body measures were available and recruitment could be adequately scored. The ratio  
181 between weight (grams) and ulna length (millimetres) at age 70 days was used as an  
182 indicator of body condition at fledging. This ratio accounts for the sexual size dimorphism  
183 of the boobies; at 79 days old, females weigh approximately 26% more than males, and  
184 their ulnas are 10% longer (Torres & Drummond, 1999). To remove year effects, individual  
185 body condition was calculated as the z-normal standardized annual body condition at  
186 fledging of the colony. Boobies weighed (mean  $\pm$  SD)  $1593.51 \pm 256.2$  grams at fledging  
187 with an ulna length of  $205.57 \pm 12.98$  millimetres.

188 ENSO conditions during the reproductive season in which a focal breeder was born were  
189 expressed as the average of the 8 monthly (December to July) sea surface temperature  
190 anomalies (SSTA) at the closest oceanographic station, 55 km from the colony, obtained  
191 from the IRI Data Library  
192 [http://iridl.ldeo.columbia.edu/SOURCES/.NOAA/.NCEP/.EMC/.CMB/.GLOBAL/.Reyn\\_SmithOIv2/.monthly/.sst/](http://iridl.ldeo.columbia.edu/SOURCES/.NOAA/.NCEP/.EMC/.CMB/.GLOBAL/.Reyn_SmithOIv2/.monthly/.sst/). Niño and La Niña years were characterized by mean SSTA of at  
194 least  $+0.5^{\circ}\text{C}$  or  $-0.5^{\circ}\text{C}$ , respectively, using the criteria of NOAA, obtained from the El Niño  
195 and La Niña Alert System <https://www.climate.gov/news-features/understanding-climate/el-ni%C3%B1o-and-la-ni%C3%B1a-alert-system>. The Southern Oscillation Index  
196 (SOI) was not used because SSTAs are more closely related to the breeding parameters and  
197

198 age at first reproduction of this population (Ancona & Drummond, 2013; Ancona et al.,  
199 2011).

## 200 *Statistical analysis*

201 All analyses were performed in R statistical environment (R Development Core Team,  
202 2018). All variables were standardized prior to model fitting to minimize collinearity of  
203 linear and quadratic terms and to facilitate the interpretation of the relative strength of  
204 parameter estimates (Cade, 2015; Grueber, Nakagawa, Laws, & Jamieson, 2011). Because  
205 high or even moderate collinearity can inflate standard errors of coefficient estimates and  
206 make genuine effects harder to detect (Zuur, Ieno, & Elphick, 2010), the variance inflation  
207 factor (VIF) was calculated for each variable in every hypothesis-based model, so that  
208 variables with VIF values higher than 2 could be excluded from the final analyses (none  
209 were). All VIF values are reported in the supplementary materials (Supporting  
210 information). Models were fitted with a Gaussian error distribution and an identity link  
211 function. Variable standardization was carried out using the *rescale* function in the R  
212 package *arm* (Gelman et al., 2016). We used the *lmer* function in the package *lme4* (Bates,  
213 Maechler Martin, & Walker, 2016) to build the LMMs; LMs were built using the built-in  
214 function *lm* in R. Model selection was carried out with *model.sel* function in the MuMIn  
215 package (Bartón, 2016)<sup>35</sup>, *mod.avg* function was used to average models within a 95%  
216 confidence interval (CI; Burnham, Anderson, & Huyvaert, 2011), and *confint* function to  
217 calculate the CI of each parameter.

218 To assess the effects of recruits' early-life conditions on their annual breeding success and  
219 their fledglings' viability, we first constructed a base model (a LMM accounting for

220 previously demonstrated effects in the species; *sensu* Panagakis, Hamel, & Côté, 2017) for  
221 each analysis; this contained the linear and quadratic expression of breeder age and laying  
222 date, with breeder identity as random effect. For annual breeding success, SSTA in each  
223 reproductive year was also included in base models. The linear expression of year of birth  
224 was included in every model, irrespective of its statistical significance (cf. Bouwhuis,  
225 Vedder, & Becker, 2015), to reflect the fact that the earlier an individual was born, the  
226 higher its lifespan could be, biasing our dataset. From these base models, we constructed a  
227 series of competing models which included SSTA in the natal year (the early-life-condition  
228 variable), whether it was the individual's terminal reproductive event (1-0 variable), and the  
229 linear and quadratic expressions of age of first reproduction along with two-way  
230 interactions: SSTA in the natal year  $\times$  age<sup>2</sup>, age of first reproduction  $\times$  age<sup>2</sup> and SSTA in the  
231 natal year  $\times$  age of last reproduction. SSTA in the reproductive year was added to  
232 competing models for the analysis of offspring viability. Age of first reproduction was  
233 included to evaluate the indirect effects of early adversity, as this life history trait has been  
234 shown to vary with natal ENSO conditions (Ancona & Drummond, 2013) and is a major  
235 determinant of fitness (Pärt, 1995); its quadratic expression was added to detect an optimal  
236 onset of reproduction (e.g. Mourocq et al., 2016). The interactions were included to detect  
237 differences in senescence patterns due to natal conditions or age of first reproduction.

238 To test whether adult lifespan and lifetime reproductive success were influenced by early-  
239 life conditions, we used linear models (LMs). For both analyses, year of birth was also  
240 included in all competing models as a fixed variable. Variables included in the models were  
241 SSTA in the natal year and the linear and quadratic expression of age of first reproduction.

242 For lifetime reproductive success adult lifespan was added to the competing models, along  
243 with its interaction with age of first reproduction.

244 To test for increased representation in warm water years of breeders of above average  
245 quality or peak reproductive ages (10-14 years, middle aged), or from cool water natal  
246 years ( $< -0.5$  SSTA), as well as diminished representation of both young (1-9 years) and old  
247 (15-23 years) breeders, we built linear models including sex as a factor and using the linear  
248 expression of year of reproduction to account for progressive increase in the proportions of  
249 middle-aged and old birds among ringed birds with additional years of monitoring and  
250 ringing.

251 We compared the proportions of nestlings that fledge under different ENSO conditions by  
252 building a LM for each brood size. To compare the probabilities of recruiting after fledging  
253 in different ENSO conditions, and test for self-selection of above average breeders for  
254 reproduction in warm water conditions (self-selection), we built LMMs. For all three  
255 analyses, year of birth and SSTA in the natal year were included as fixed variables. For the  
256 recruitment analysis, body condition at fledging and chick rank (1<sup>st</sup>, 2<sup>nd</sup> or 3<sup>rd</sup> hatched) were  
257 included in the competing models, along with three two-way interactions: SSTA in the  
258 natal year x body condition, SSTA in the natal year x chick rank, and chick rank x body  
259 condition. Nest identity was added as a random effect because, in some cases, siblings were  
260 included in the analysis. Body condition and rank were included to test whether low values  
261 affect recruitment. The interactions tested whether poor natal environments increase the  
262 cost of poor body condition or low rank, and evaluated whether body condition at fledging  
263 varies with rank.

264 On the basis of AICc,  $\Delta$ AICc, and AICc weights ( $w_i$ ) of the competing models, we selected  
265 the best-supported model, or averaged a subset of the best-supported models with a  
266 cumulative Akaike weight of  $\sim 0.95$ . For each resulting model, we calculated the estimates  
267 (all reported effect sizes were standardized to two SDs) and 95% confidence intervals (CI).  
268 Model selection tables and summaries of best-supported and averaged models are provided  
269 in the supplementary materials.  
270

271 **Results**

272 *Fitness effects of natal ENSO conditions*

273 Annual breeding success (number of fledglings produced) of 1893 female recruits from the  
274 18 birth cohorts was unaffected by water temperature in the natal year (Table S2; Figure  
275 1a). Natal water temperature affected the annual breeding success of 2143 male recruits,  
276 but not in the expected direction. Males that experienced warm natal waters produced  
277 slightly more fledglings annually than those born under more favourable conditions ( $\beta =$   
278 0.009 [95% Confidence Interval: 0.008 to 0.048]; Figure 1), with males fledged under a  
279 +0.8 °C SSTA (sea surface temperature anomaly) predicted to produce roughly 6% more  
280 fledglings than males fledged under a -0.8 °C anomaly (the extreme anomalies observed).  
281 Consistent with previous reports (Ancona et al., 2011; Drummond et al., 2003), boobies of  
282 both sexes increased their annual breeding success with earliness of laying and current  
283 coolness of the sea, and showed senescence after a peak in reproductive success at roughly  
284 ages 10-14 years (Beamonte-Barrientos, Velando, Drummond, & Torres, 2010; Alberto  
285 Velando, Drummond, & Torres, 2006). Importantly, natal SSTA did not interact with age  
286 (Table S3), showing that warm natal waters had no effect on either the rate of increase in  
287 breeding success during early adult years or the rate of decline during late adult years  
288 (reproductive senescence).

289 Viability (probability of recruitment) of the fledglings produced by 1646 male and 1329  
290 female recruits at all ages over the lifespan was unaffected by those recruits' natal water  
291 temperature (Table S5; Figure 1b), although other variables were influential. Fledglings  
292 produced by both sexes in warm water years were less likely to recruit (Males:  $\beta = -0.194$

293 [95% CI: -0.222 to -0.166]; Females:  $\beta = -0.195$  [95% CI: -0.231 to -0.159]) and, at all  
294 ages, earliness of laying increased the viability of fledglings produced (Males:  $\beta = -0.128$   
295 [95% CI: -0.156 to -0.101]; Females:  $\beta = -0.112$  [95% CI: -0.146 to -0.077]). A recruit's  
296 age had a quadratic effect on the probability its offspring would recruit (Table S6), with  
297 peaks at roughly 10 years in males and 11 years in females.

298 The lifespan of recruits was unaffected by natal water temperature (Table S8; Figure 1c),  
299 but increased with late recruitment in both sexes (Males: 0.139 [95% CI: 0.090 to 0.0.189];  
300 Females: 0.213 [95% CI: 0.160 to 0.266]), although this effect might arise simply because  
301 late recruits cannot die early.

302



303

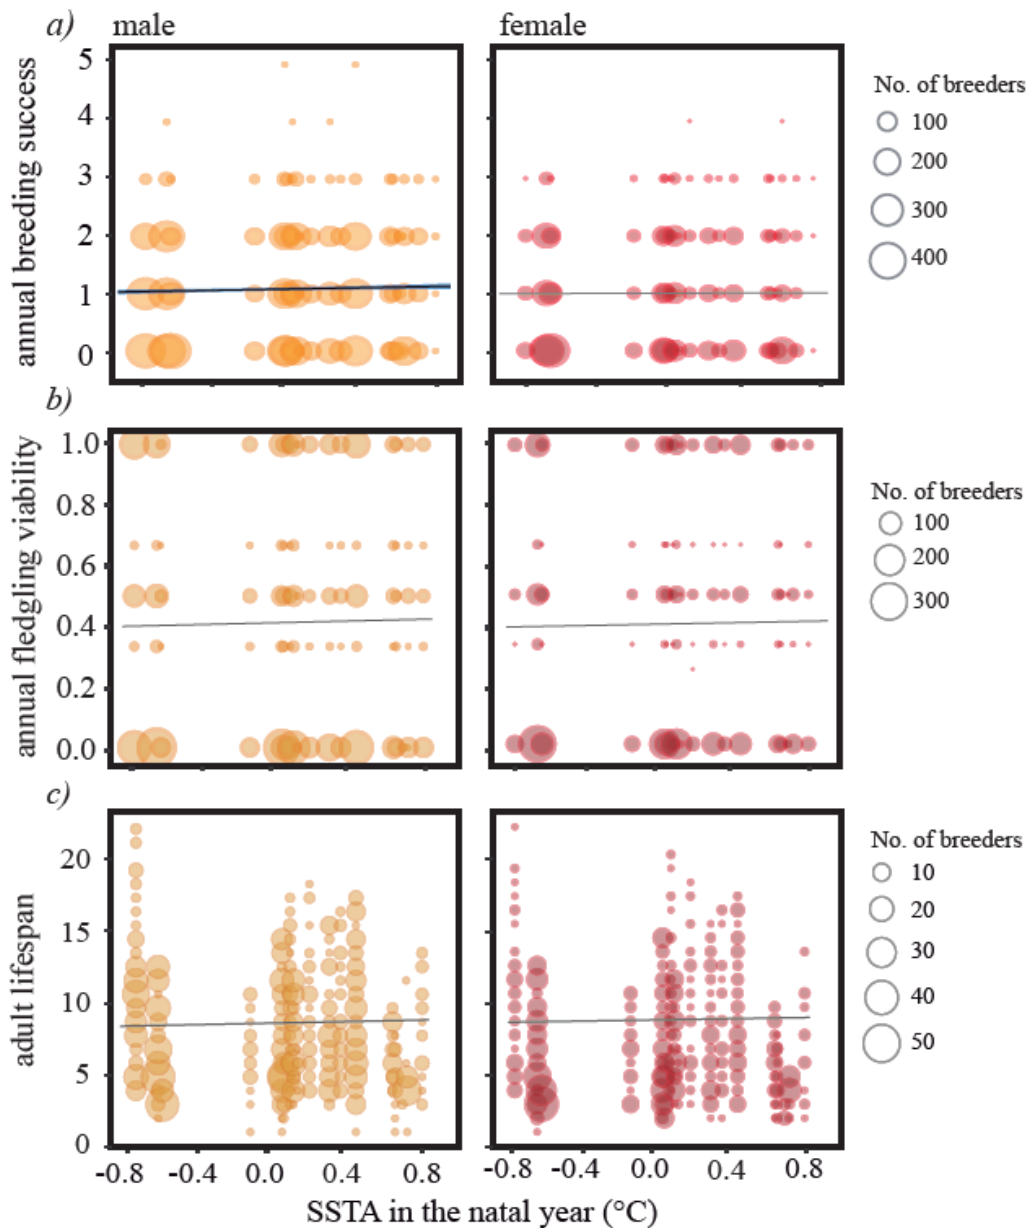

304 **Fig. 1. Effect of SSTA in natal year on annual breeding success, fledgling viability**  
305 **and lifespan. a)** A male booby's breeding success (fledglings produced) increased slightly  
306 with its natal SSTA (Sea Surface Temperature Anomaly), whereas a female's breeding  
307 success was unaffected. Points represent 2143 male and 1893 female breeders observed  
308 over their lifespans. **b)** For 1646 male and 1329 female breeders, the proportion of their

309 annually produced fledglings that recruited was unaffected by their natal SSTA. c) Adult  
310 lifespan of 1319 male and 1105 female breeders was not affected by natal SSTA. Solid line  
311 represents model predictions, with 95% confidence intervals in blue; grey lines show the  
312 statistically unsupported tendencies for the other five analyses.

313 Finally, lifetime reproductive success (total recruits produced) of both sexes was unaffected  
314 by natal water temperature (Table S11; Figure 2), although in both sexes age of recruitment  
315 and adult lifespan were influential. Boobies with younger ages of first reproduction  
316 produced more recruits over their lifetime than those that started later in life (Males:  $\beta = -$   
317  $0.086$  [95% CI:  $-0.126$  to  $-0.046$ ]; Females:  $\beta = -0.062$  [95% CI:  $-0.119$  to  $-0.013$ ]). Greater  
318 adult lifespan, itself associated with delayed age of first reproduction, also increased  
319 lifetime production of recruits in both sexes (Males:  $\beta = 0.715$  [95% CI:  $0.670$  to  $0.761$ ];  
320 Females:  $\beta = 0.619$  [95% CI:  $0.561$  to  $0.677$ ]). Note that despite achieving roughly 6%  
321 higher annual breeding success than cool natal water males over the lifespan, warm natal  
322 water males showed no corresponding increase in lifetime reproductive success, probably  
323 because they skipped more breeding seasons than cool water males (Ancona & Drummond,  
324 2013). Warm natal water females showed no such increase in annual breeding success, but  
325 females are nearly one third heavier than males and more susceptible to food deprivation  
326 (Torres & Drummond, 1997; Velando, 2002).

327

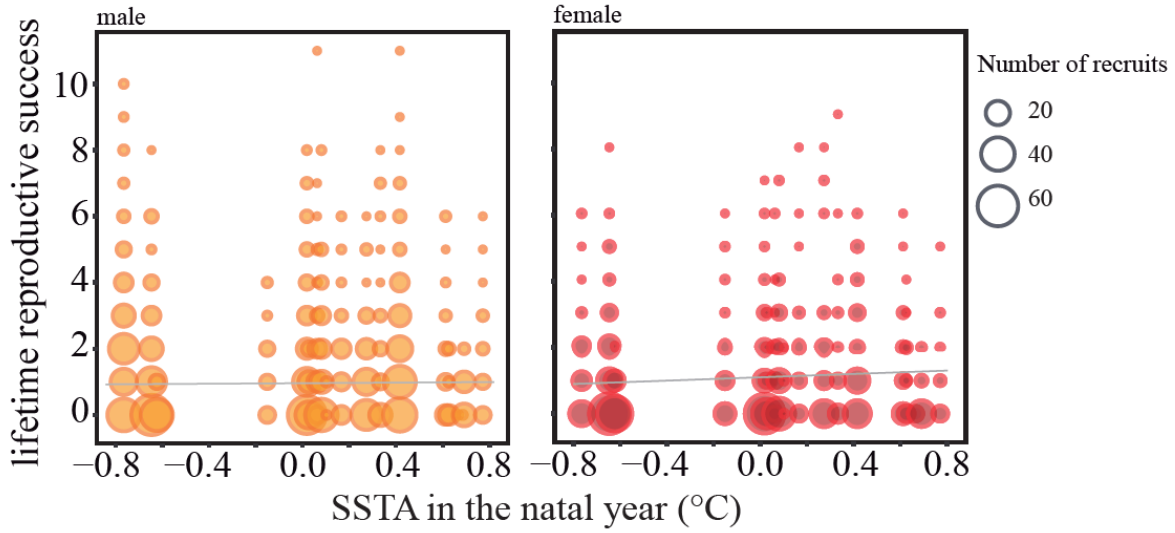

328

329 **Fig. 2.** Lifetime production of recruits was unaffected by natal water temperature. Data for

330 1319 male and 1105 female breeders. Grey lines show the statistically unsupported

331 tendency for production to increase in both sexes with warm natal water.

332

333 *Self-selection for breeding in El Niño conditions*

334 In warm water years neither boobies of above average quality nor boobies born in cool  
335 water (La Niña) years increased their proportional representation among breeders ( $n =$   
336 4036; Tables S13-S15) but, contrary to expectation, middle aged boobies substantially  
337 diminished theirs ( $\beta = -0.317$  [95% CI: -0.470 to -0.164]) and the proportions of both  
338 young (1-9 years) and old (>14 years) boobies among breeders increased (Young:  $\beta = 0.193$   
339 [95% CI: 0.068 to 0.318]; Old:  $\beta = 0.175$  [95% CI: 0.020 to 0.331]).

340 In this booby, despite young and old individuals showing inferior breeding success (see  
341 fitness effects), young-with-old parental pairings produce the most viable (likely to recruit)  
342 fledglings (Drummond & Rodríguez, 2015), so we hypothesized that overrepresentation of  
343 young and old breeders in warm years could increase the proportion of young + old  
344 pairings and hence the average quality of fledglings and recruits. We tested for this effect  
345 on pairings by calculating the proportional representation of all six possible pairings of  
346 young, middle aged and old boobies in every year between 1993 and 2017 (Table S16).  
347 Sex, as a factor, was not included in the LMs because greater viability of offspring of  
348 young-old pairs is independent of which sex is the older pair mate (Boyko, 2008;  
349 Drummond & Rodríguez, 2015). These analyses showed that warm water is indeed  
350 associated with an increase in the proportion of young + old pairings, and also with a  
351 decrease in the proportion of young + middle aged pairings (Young + old:  $\beta = 0.280$  [95%  
352 CI: 0.072 to 0.487]; Young + Middle aged:  $\beta = -0.340$  [95% CI: -0.614 to -0.067]; Figure  
353 3).

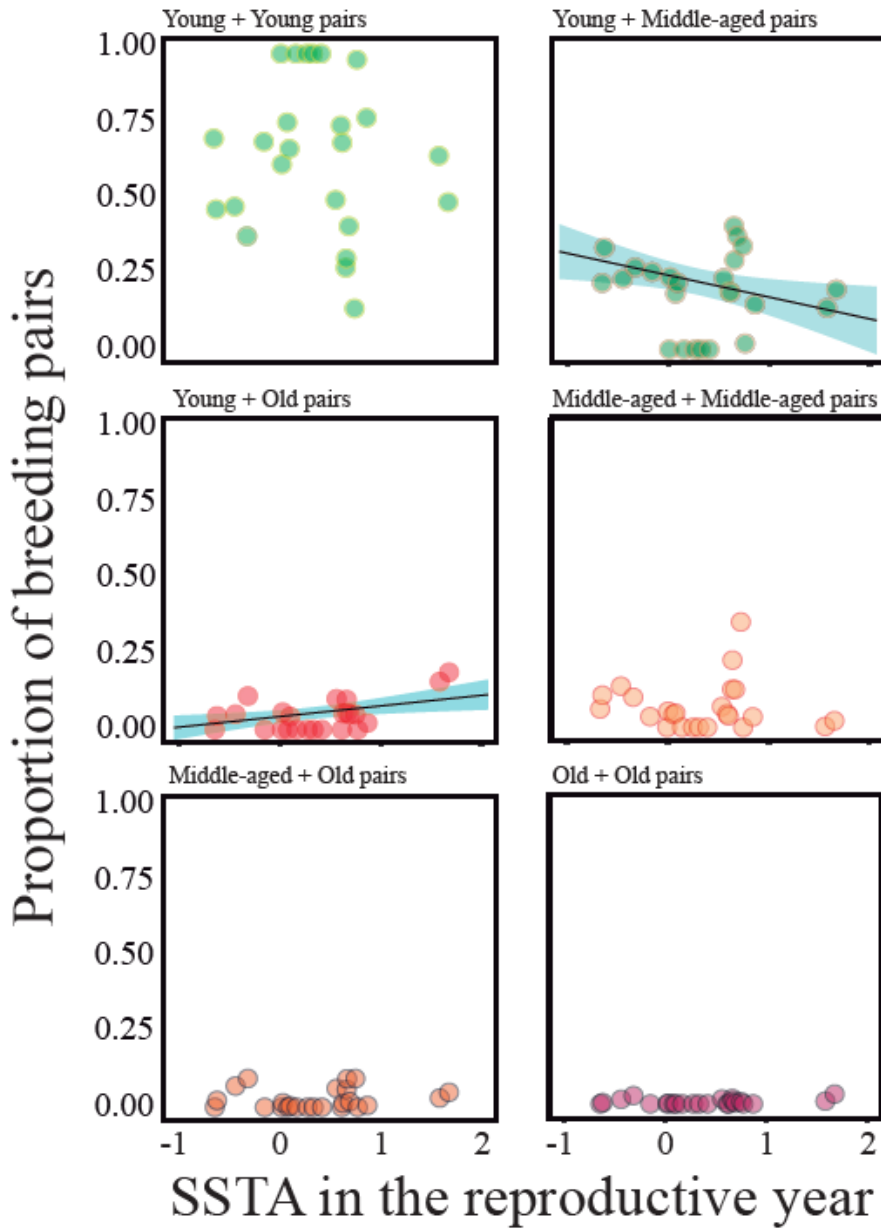

354

355 **Fig. 3.** In warm water years the proportion of young + old pairs increased, and the  
356 proportion of young + middle aged pairs decreased.

357

358 *Viability selection in El Niño conditions*

359 Both nestling and juvenile mortality increased with the warmth of natal waters, potentially  
360 increasing the influence of any recruitment bias in favour of higher quality cohort members.  
361 Nestlings from all three brood sizes were less likely to fledge in the warmest natal  
362 condition than in the coolest (Table S17; Fig 4a), with a greater differential in three-chick  
363 broods ( $\beta = -0.27$  [95% CI: -0.32 to -0.22]) than in one- and two-chick broods ( $\beta = -0.10$   
364 [95% CI: -0.12 to -0.08] and  $\beta = -0.14$  [95% CI: -0.16 to -0.12], respectively), and with 2<sup>nd</sup>  
365 and 3<sup>rd</sup> hatched chicks especially liable to fail, independent of natal water temperature  
366 (Table S19; Figure. 4b). Fledgling body condition was key: in all cohorts, poor condition  
367 reduced the probability of recruiting ( $\beta = 0.07$  [95% CI: 0.05 to 0.08]; Figure. 4c).  
368 Importantly, compared to cohorts from the coolest water, 23% fewer chicks from cohorts of  
369 the warmest water fledged, and 26% fewer fledglings from cohorts of the warmest water  
370 went on to recruit.

371

372

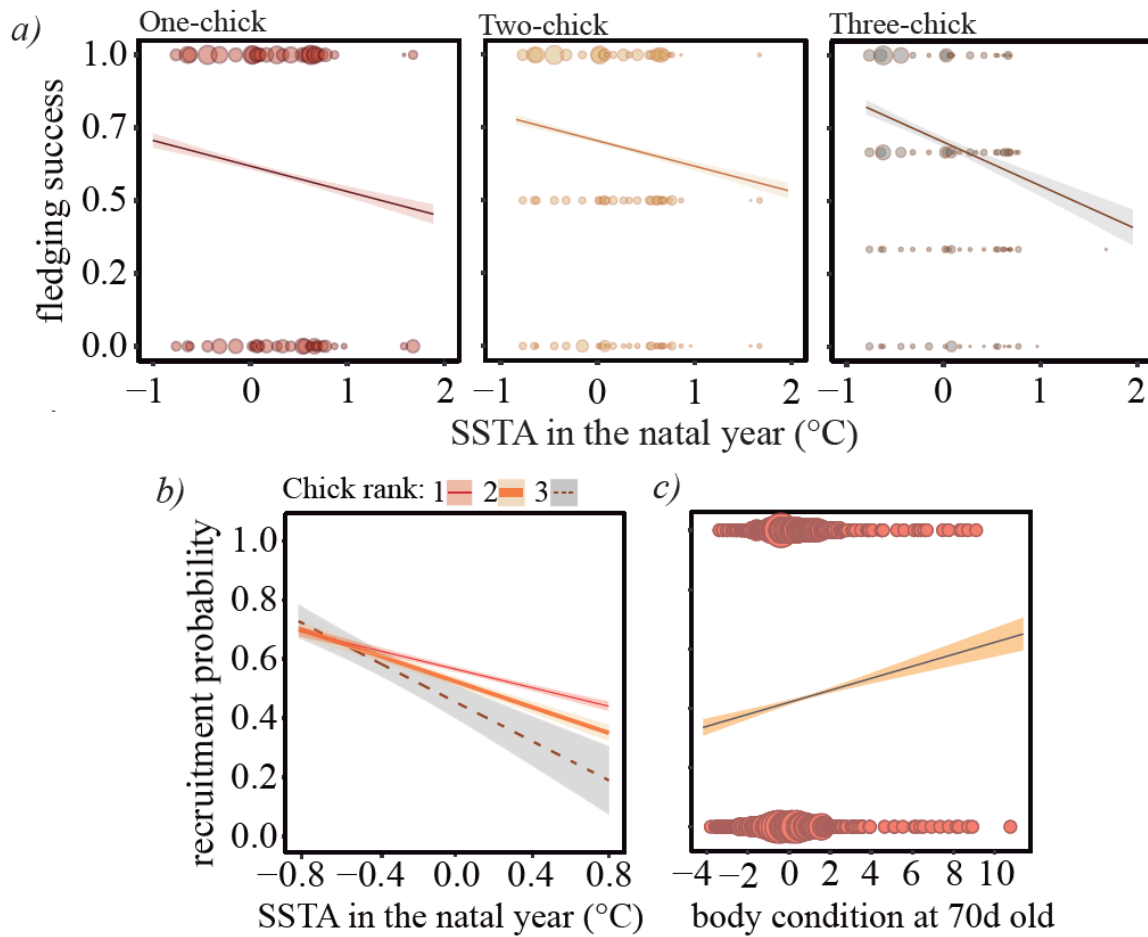

373

374 **Fig. 4.** a) The proportion of chicks from 15621 broods that managed to fledge decreased  
375 with the warmth of natal waters. The probability of recruiting for 10604 unsexed fledglings  
376 b) decreased with the warmth of natal waters, especially for second and third chicks, and c)  
377 in every year was higher for offspring that fledged with good body condition.

378

379 **Discussion**

380 Given the developmental susceptibility of birds to experimental stresses in infancy,  
381 including food scarcity, compensatory growth, elevated corticosterone and parasitic  
382 infection, as well as poor weather, habitats, prey availability, parental care and late fledging  
383 (Drummond & Ancona, 2015), it is remarkable that the annual breeding success, offspring  
384 viability, adult lifespan and lifetime reproductive success of adult booby generations are not  
385 affected by exposure to El Niño in their natal year. However, it remains to be shown that  
386 the viable offspring of recruits from warm water cohorts pay no reproductive costs after  
387 recruitment (an intergenerational effect; Naguib & Gil, 2005; cf. Bouwhuis et al., 2015).  
388 We conclude that, even though warm waters can severely prejudice breeding participation  
389 of the focal population and impact not only clutch sizes but also hatching, fledging and  
390 recruitment success (Ancona, Zúñiga-Vega, Rodríguez, & Drummond, 2018), as well as  
391 adult survival (Oro et al., 2010), the recruits derived from warm water cohorts can  
392 contribute normally to the population's growth rate.

393 We identified two mechanisms that probably contribute to warm water recruits performing  
394 as well as cool water recruits. Self-selection for breeding in warm water years probably  
395 makes a small contribution. High-quality boobies, boobies raised in cool water conditions,  
396 and boobies of prime reproductive ages (middle aged) do not increase their representation  
397 among breeders in warm years. However, young + old pairs increase their representation to  
398 7% of breeding pairs in El Niño years, so their progeny could boost the average quality of  
399 recruits from El Niño years provided the high quality conferred on fledglings by those  
400 pairings persists into adult life. Considering the extremes, a fledgling produced by a pair  
401 1yr + 21yr old is roughly 80% more likely to recruit than that of a pair 1yr + 1yr old



402 (Drummond & Rodríguez, 2015). Nonetheless if, as hinted in Figure 3, the relationship  
403 between water temperature and proportion of young + old pairings is a step function rather  
404 than a linear function, then that representation may ascend to roughly 20% of breeding  
405 pairs in El Niño years, implying a greater potential boost to average recruit quality. Note  
406 that increases in the proportions of young and old breeders in El Niño years could serve  
407 functions unrelated to the benefit of pairing with opposite-age partners. For example, red-  
408 footed booby (*S. sula*) pre-breeders show preference for recruiting in El Niño years and are  
409 thought to do so because competition may be weaker (Cubaynes et al., 2010), and after age  
410 14 years blue-footed boobies may be penalized for skipping reproduction because their  
411 annual survival is in decline and increasingly variable (Drummond, Rodriguez, & Oro,  
412 2011).

413 The second mechanism, viability selection on offspring, is more prevalent and probably  
414 more influential than filtering of breeders. The increase in mortality among booby offspring  
415 in warm water years should raise the average reproductive value of recruits to the extent  
416 that mortality falls disproportionately on low quality individuals. In the nestling period,  
417 dominance ranks in the brood derive from 4-day hatch intervals and selective mortality in  
418 broods of two and three is dictated by hatch order rather than individual quality  
419 (Drummond & Garcia Chavelas, 1989; Drummond, González, & Osorno, 1986), so  
420 viability selection may be weak. By contrast, in the pre-breeding period, when juvenile  
421 boobies transition to independent feeding and compete for reproductive opportunity in the  
422 colony, their survival and recruitment, associated with high body condition at fledging, may  
423 depend largely on individual quality. If so, the increase in fledgling mortality from roughly  
424 25% in cohorts from the coolest years to 60% in cohorts from the warmest years marks an

425 increase in viability selection that could substantially raise the average phenotypic quality  
426 of recruits from El Niño cohorts.

427 The explanation for reproductive equivalence of generations of recruits from El Niño  
428 cohorts lies in a combination of developmental resilience of blue-footed booby offspring,  
429 increased viability selection among them, especially during the pre-breeding period, and  
430 increased participation of young + old breeding pairs. Developmental resilience probably  
431 depends on increased investment by parents caring for late, slow-growing offspring during  
432 food scarcity, and also on physiological adaptations and life history adjustments of those  
433 offspring, which tend to recruit at an early age and skip more breeding years (Ancona &  
434 Drummond, 2013). We found that early recruitment generally increases lifetime  
435 reproductive success, and warm water cohorts obtain this benefit while avoiding both  
436 increase in mortality at any adult age (Ancona et al., 2018) and the longevity cost (Table  
437 S12) of reproductive investment early in life, apparently by skipping some breeding  
438 seasons. Blue-footed boobies may not be alone in this ability to parry impacts of a stressful  
439 natal environment by making life history adjustments. Females of the reintroduced  
440 Mauritius kestrel (*Falco punctatus*) mitigate fitness penalties of an anthropogenically  
441 altered natal environment by modifying their schedule of reproductive effort (Cartwright et  
442 al., 2014), although it is unclear whether their lifespan is affected.

443 The prevalence among animal species of El Niño cohort effects on the reproductive value  
444 of recruits is unknown, and we may find that many species have evolved ways of coping.  
445 Exposure of species of the southern and eastern Pacific ocean to ENSO-like oscillations  
446 since at least the mid-Holocene (Corrège et al., 2000) has probably honed the evolution of  
447 developmental, behavioural and life history traits that contribute to the reproductive

448 equivalence of adult generations. Nonetheless, given the well-documented developmental  
449 susceptibility of infant vertebrates to adverse natal environments and the increasing severity  
450 of El Niño events, it is likely that natal El Niño conditions compromise the reproductive  
451 potential of affected generations of some species, and that such effects will increase in the  
452 near future. We should examine other species, to document natal El Niño impacts on  
453 reproductive potential, to identify filtering effects and other means by which species  
454 sidestep or resist impacts, and to explore their demographic consequences.

#### 455 **Acknowledgments**

456 We thank numerous volunteers for enthusiastic work in the field and on the database; the  
457 Armada de México, staff of SEMARNAT and local fishermen for logistical support.  
458 Santiago Ortega was supported by grants from the Consejo Nacional de Ciencia y  
459 Tecnología (CONACYT) and the Coordinación General de Estudios de Posgrado, UNAM,  
460 during his studies in the Posgrado de Ciencias Biológicas, UNAM. Funding for this project  
461 was provided by grants to HD from CONACYT (255826) and the National Geographic  
462 Society (9974-16). For comments on earlier drafts we thank María Valverde, Alejandro  
463 Gonzalez-Voyer and Sergio Ancona. This paper constitutes the fulfilment of a requirement  
464 for obtaining the degree of Maestro en Ciencias Biológicas in the field of Biología  
465 Evolutiva of the Posgrado en Ciencias Biológicas de la UNAM.

#### 466 **Author's contributions**

467 SO and HD conceived the study, HD and CR collected the data, SO analysed the data, SO  
468 and HD led the writing of the manuscript. All authors contributed critically to the drafts and  
469 gave final approval for publication.

470 **Data accessibility**

471 Data files are available from Dryad upon manuscript acceptance.

472 **Supporting information**

473 Addition Supporting Information may be found in the online version of this article.

474 **References**

475 Ancona, S., & Drummond, H. (2013). Life History Plasticity of a Tropical Seabird in  
476 Response to El Niño Anomalies during Early Life. *PLoS ONE*, 8(9), 1–11. doi:  
477 10.1371/journal.pone.0072665

478 Ancona, S., Sánchez-Colón, S., Rodríguez, C., & Drummond, H. (2011). El Niño in the  
479 Warm Tropics: Local sea temperature predicts breeding parameters and growth of  
480 blue-footed boobies. *Journal of Animal Ecology*, 80(4), 799–808. doi: 10.1111/j.1365-  
481 2656.2011.01821.x

482 Ancona, S., Zúñiga-Vega, J. J., Rodríguez, C., & Drummond, H. (2018). Experiencing El  
483 Niño conditions during early life reduces recruiting probabilities but not adult  
484 survival. *Royal Society Open Science*. doi: 10.1098/rsos.170076

485 Bartón, K. (2016). Multi-Model Inference. *CRAN Repository*. CRAN Repository.

486 Bates, D., Maechler Martin, & Walker, S. (2016). Package “lme4”: Linear Mixed-Effects  
487 Models using “Eigen” and S4. *CRAN Repository*, pp. 1–113. doi:  
488 10.18637/jss.v067.i01

489 Beamonte-Barrientos, R., Velando, A., Drummond, H., & Torres, R. (2010). Senescence of  
490 Maternal Effects- Aging Influences Egg Quality and Rearing Capacities of a Long-

- 491 Lived Bird. *The American Naturalist*, 175(4), 469–470. doi: 10.1086/650726
- 492 Bouwhuis, S., Vedder, O., & Becker, P. H. (2015). Sex-specific pathways of parental age  
493 effects on offspring lifetime reproductive success in a long-lived seabird. *Evolution*,  
494 69(7), 1760–1771. doi: 10.1111/evo.12692
- 495 Boyko, A. R. (2008). Optimal age difference cannot differ between monogamous males and  
496 females: a comment on Fieder and Huber. *Biology Letters*, 4(1), 82–82. doi:  
497 10.1098/rsbl.2007.0456
- 498 Burnham, Anderson, D. R., & Huyvaert, K. P. (2011). AIC model selection and multimodel  
499 inference in behavioral ecology: Some background, observations, and comparisons.  
500 *Behavioral Ecology and Sociobiology*, 65(1), 23–35. doi: 10.1007/s00265-010-1029-6
- 501 Burton, T., & Metcalfe, N. B. (2014). Can environmental conditions experienced in early  
502 life influence future generations? *Proc. R. Soc. B.*, 281(20140311). doi:  
503 <http://dx.doi.org/10.1098/rspb.2014.0311>
- 504 Cade, B. S. (2015). Model averaging and muddled multimodel inferences. *Ecology*, 96(9),  
505 2370–2382. doi: <https://doi.org/10.1890/14-1639.1>
- 506 Cai, W., Borlace, S., Lengaigne, M., Van Rensch, P., Collins, M., Vecchi, G., ... Jin, F. F.  
507 (2014). Increasing frequency of extreme El Niño events due to greenhouse warming.  
508 *Nature Climate Change*, 4(2), 111–116. doi: 10.1038/nclimate2100
- 509 Cartwright, S. J., Nicoll, M. A. C., Jones, C. G., Tatayah, V., & Norris, K. (2014).  
510 Anthropogenic natal environmental effects on life histories in a wild bird population.  
511 *Current Biology*, 24(5), 536–540. doi: 10.1016/j.cub.2014.01.040

- 512 Corrège, T., Delcroix, T., Récy, J., Beck, W., Cabioch, G., & Le Cornec, F. (2000).  
513 Evidence for stronger El Niño-Southern Oscillation (ENSO) events in a mid-Holocene  
514 massive coral. *Paleoceanography*, 15(4), 465–470. doi: 10.1029/1999PA000409
- 515 Cubaynes, S., Doherty, P. F., Schreiber, E. A., Gimenez, O., & Jr, P. F. D. (2010). *To breed*  
516 *or not to breed : a seabird ' s response to extreme climatic events Subject collections*  
517 *To breed or not to breed : a seabird ' s response to extreme climatic events.* (October),  
518 303–306.
- 519 Dmitriew, C., & Rowe, L. (2007). Effects of early resource limitation and compensatory  
520 growth on lifetime fitness in the ladybird beetle (*Harmonia axyridis*). *Journal of*  
521 *Evolutionary Biology*, 20(4), 1298–1310. doi: 10.1111/j.1420-9101.2007.01349.x
- 522 Douhard, M., Loe, L. E., Stien, A., Bonenfant, C., Irvine, R. J., Veiberg, V., ... Albon, S.  
523 (2016). The influence of weather conditions during gestation on life histories in a wild  
524 Arctic ungulate. *Proceedings of the Royal Society B: Biological Sciences*, 283(1841),  
525 20161760. doi: 10.1098/rspb.2016.1760
- 526 Drummond, H., & Ancona, S. (2015). Observational field studies reveal wild birds  
527 responding to early-life stresses with resilience, plasticity, and intergenerational  
528 effects. *The Auk*, 132(132), 563–576. doi: 10.1642/AUK-14-244.1
- 529 Drummond, H., & Garcia Chavelas, C. (1989). Food shortage influences sibling aggression  
530 in the blue-footed booby. *Animal Behaviour*, 37, 806–819. doi: 10.1016/0003-  
531 3472(89)90065-1
- 532 Drummond, H., González, E., & Osorno, J. L. (1986). Parent-offspring cooperation in the  
533 blue-footed booby (*Sula nebouxii*): social roles in infanticidal brood reduction.

- 534 *Behavioral Ecology and Sociobiology*, 19(5), 365–372. doi: 10.1007/BF00295710
- 535 Drummond, H., & Rodríguez, C. (2013). Costs of growing up as a subordinate sibling are  
536 passed to the next generation in blue-footed boobies. *Journal of Evolutionary Biology*,  
537 26(3), 625–634. doi: 10.1111/jeb.12087
- 538 Drummond, H., & Rodríguez, C. (2015). Viability of booby offspring is maximized by  
539 having one young parent and one old parent. *PLoS ONE*, 10(7), 1–14. doi:  
540 10.1371/journal.pone.0133213
- 541 Drummond, H., Rodríguez, C., & Oro, D. (2011). Natural “poor start” does not increase  
542 mortality over the lifetime. *Proceedings of the Royal Society B: Biological Sciences*,  
543 278(1723), 3421–3427. doi: 10.1098/rspb.2010.2569
- 544 Drummond, H., Torres, R., & Krishnan, V. V. (2003). Buffered Development- Resilience  
545 after Aggressive Subordination in Infancy. *The American Naturalist*, 161(5), 794–807.  
546 doi: 10.1086/375170
- 547 Garratt, M., Lemaître, J. F., Douhard, M., Bonenfant, C., Capron, G., Warnant, C., ...  
548 Gaillard, J. M. (2015). High juvenile mortality is associated with sex-specific adult  
549 survival and lifespan in wild roe deer. *Current Biology*, 25(6), 759–763. doi:  
550 10.1016/j.cub.2014.11.071
- 551 Gelman, A., Su, Y.-S., Yajima, M., Hill, J., Grazia Pittau, M., Kerman, J., ... Dorie, V.  
552 (2016). Data Analysis Using Regression and Multilevel/Hierarchical Models. *CRAN*  
553 *Repository*.
- 554 Goutte, A., Kriloff, M., Weimerskirch, H., & Chastel, O. (2011). Why do some adult birds  
555 skip breeding? A hormonal investigation in a long-lived bird. *Biology Letters*, 7(5),

- 556 790–792. doi: 10.1098/rsbl.2011.0196
- 557 Grace, J. K., Martin-Gousset, L., & Angelier, F. (2017). Delayed effect of early-life  
558 corticosterone treatment on adult anti-predator behavior in a common passerine.  
559 *Physiology and Behavior*, 177(April), 82–90. doi: 10.1016/j.physbeh.2017.04.018
- 560 Grueber, C. E., Nakagawa, S., Laws, R. J., & Jamieson, I. G. (2011). Multimodel inference  
561 in ecology and evolution: Challenges and solutions. *Journal of Evolutionary Biology*,  
562 24(4), 699–711. doi: 10.1111/j.1420-9101.2010.02210.x
- 563 Guerra, C. G., Fitzpatrick, L. C., Aguilar, R., & Venables, B. J. (1988). *Reproductive*  
564 *Consequences of El Niño-Southern Oscillation in Gray Gulls ( Larus modestus )*.  
565 11(2), 170–175.
- 566 Ham, Y. (2018). El Niño events set to intensify. *Nature*, 564, 192–193. doi: doi:  
567 10.1038/d41586-018-07638-w
- 568 Hays, C. (1986). Effects of the 1982-1983 El Nino on Humboldt penguin colonies in Peru.  
569 *Biological Conservation*, 36(2), 169–180. doi: 10.1016/0006-3207(86)90005-4
- 570 Haywood, S., & Perrins, C. M. (1992). Is Clutch Size in Birds Affected by Environmental  
571 Conditions during Growth? *Proceedings of the Royal Society of London. Series B:*  
572 *Biological Sciences*, 249(1325), 195–197. doi: 10.1098/rspb.1992.0103
- 573 Hodder, J., & Graybill, M. R. (1985). Reproduction and Survival of Seabirds in Oregon  
574 during the 1982-1983 El Niño. *The Condor*, 87(4), 535–541. doi: 10.2307/1367954
- 575 Kiere, L. M., & Drummond, H. (2016). Female infidelity is constrained by El Niño  
576 conditions in a long-lived bird. *Journal of Animal Ecology*, 85(4), 960–972. doi:



- 577 10.1111/1365-2656.12537
- 578 Kim, S. Y., Torres, R., Domínguez, C. A., & Drummond, H. (2007). Lifetime philopatry in  
579 the blue-footed booby: A longitudinal study. *Behavioral Ecology*, *18*(6), 1132–1138.  
580 doi: 10.1093/beheco/arm091
- 581 Le Boeuf, B. J., & Reiter, J. (1991). Biological Effects Associated with El Niño Southern  
582 Oscillation, 1982–83, on Northern Elephant Seals Breeding at Año Nuevo, California.  
583 In F. Trillmich & K. Ono, A. (Eds.), *Pinnipeds and El Niño Responses to*  
584 *Environmental Stress* (pp. 206–218). doi: 10.1007/978-3-642-76398-4\_24
- 585 Mojica, J. P., & Kelly, J. K. (2010). Viability selection prior to trait expression is an  
586 essential component of natural selection. *Proceedings of the Royal Society B:*  
587 *Biological Sciences*, *277*(1696), 2945–2950. doi: 10.1098/rspb.2010.0568
- 588 Mourocq, E., Bize, P., Bouwhuis, S., Bradley, R., Charmantier, A., de la Cruz, C., ...  
589 Griesser, M. (2016). Life span and reproductive cost explain interspecific variation in  
590 the optimal onset of reproduction. *Evolution*, *70*(2), 296–313. doi: 10.1111/evo.12853
- 591 Mumme, R. L., Bowman, R., Pruett, M. S., & Fitzpatrick, J. W. (2015). Natal territory size,  
592 group size, and body mass affect lifetime fitness in the cooperatively breeding Florida  
593 Scrub-Jay. *The Auk*, *132*(3), 634–646. doi: 10.1642/AUK-14-258.1
- 594 Naguib, M., & Gil, D. (2005). Transgenerational effects on body size caused by early  
595 developmental stress in zebra finches. *Biology Letters*, *1*(1), 95–97. doi:  
596 10.1098/rsbl.2004.0277
- 597 Nettle, D., Andrews, C., Reichert, S., Bedford, T., Kolenda, C., Parker, C., ... Bateson, M.  
598 (2017). Early-life adversity accelerates cellular ageing and affects adult inflammation:

- 599 Experimental evidence from the European starling. *Scientific Reports*, 7(August 2016),  
600 40794. doi: 10.1038/srep40794
- 601 Nussey, D. H., Kruuk, L. E. B., Morris, A., & Clutton-brock, T. H. (2007). Environmental  
602 conditions in early life influence ageing rates in a wild population of red deer. *Current*  
603 *Biology*, 17(23), 1000–1001. doi: <https://doi.org/10.1016/j.cub.2007.10.005>
- 604 Oro, D., Torres, R., Rodríguez, C., & Drummond, H. (2010). Climatic influence on  
605 demographic parameters of a tropical seabird varies with age and sex. *Ecology*, 91(4),  
606 1205–1214. doi: 10.1890/09-0939.1
- 607 Panagakis, A., Hamel, S., & Côté, S. D. (2017). Influence of Early Reproductive Success  
608 on Longevity and Late Reproductive Success in an Alpine Ungulate. *The American*  
609 *Naturalist*, 189(6), 667–683. doi: 10.1086/691388
- 610 Pärt, T. (1995). Does breeding experience explain increased reproductive success with age?  
611 An experiment. *Proceedings of the Royal Society B: Biological Sciences*, 260(1357),  
612 113–117. doi: 10.1098/rspb.1995.0067
- 613 Pigeon, G., Festa-Bianchet, M., & Pelletier, F. (2017). Long-term fitness consequences of  
614 early environment in a long-lived ungulate. *Proceedings of the Royal Society B:*  
615 *Biological Sciences*, 284(1853), 20170222. doi: 10.1098/rspb.2017.0222
- 616 Plard, F., Gaillard, J. M., Coulson, T., Hewison, A. J. M., Douhard, M., Klein, F., ...  
617 Bonenfant, C. (2015). The influence of birth date via body mass on individual fitness  
618 in a long-lived mammal. *Ecology*, 96(6), 1516–1528. doi: 10.1890/14-0106.1.sm
- 619 R Development Core Team. (2018). *R: A language and environment for statistical*  
620 *computing*. Retrieved from [www.r-project.org](http://www.r-project.org)

- 621 Skjaeraasen, J. E., Nash, R. D. M., Korsbrekke, K., Fonn, M., Nilsen, T., Kennedy, J., ...  
622 Kjesbu, O. S. (2012). Frequent skipped spawning in the world's largest cod  
623 population. *Proceedings of the National Academy of Sciences*, *109*(23), 8995–8999.  
624 doi: 10.1073/pnas.1200223109
- 625 Torres, R., & Drummond, H. (1997). Female-Biased Mortality in Nestlings of a Bird with  
626 Size Dimorphism. *The Journal of Animal Ecology*, *66*(6), 859. doi: 10.2307/6001
- 627 Torres, R., & Drummond, H. (1999). Variably male-biased sex ratio in a marine bird with  
628 females larger than males. *Oecologia*, *118*(1), 16–22. doi: 10.1007/s004420050698
- 629 Tovar, H., Guillen, V., & Cabrera, D. (1987). Reproduction and population levels of  
630 Peruvian guano birds, 1980 to 1986. *Journal of Geophysical Research*, *92*(C13),  
631 14445–14448. doi: 10.1029/JC092iC13p14445
- 632 Valle, C. A., Cruz, F., Cruz, J. B., Merlen, G., & Coulter, M. C. (1987). The impact of the  
633 1982–1983 El Niño-Southern Oscillation on seabirds in the Galapagos Islands,  
634 Ecuador. *Journal of Geophysical Research*, *92*(C13), 14437. doi:  
635 10.1029/jc092ic13p14437
- 636 Vargas, F. H., Harrison, S., Rea, S., & Macdonald, D. W. (2006). Biological effects of El  
637 Niño on the Galápagos penguin. *Biological Conservation*, *127*(1), 107–114. doi:  
638 10.1016/j.biocon.2005.08.001
- 639 Vargas, F. H., Lacy, R. C., Johnson, P. J., Steinfurth, A., Crawford, R. J. M., Dee Boersma,  
640 P., & Macdonald, D. W. (2007). Modelling the effect of El Niño on the persistence of  
641 small populations: The Galápagos penguin as a case study. *Biological Conservation*,  
642 *137*(1), 138–148. doi: 10.1016/j.biocon.2007.02.005

- 643 Velando, A. (2002). Experimental manipulation of maternal effort produces differential  
644 effects in sons and daughters: implications for adaptive sex ratios in the blue-footed  
645 booby. *Behavioral Ecology*, 13(4), 443–449. doi: 10.1093/beheco/13.4.443
- 646 Velando, Alberto, Drummond, H., & Torres, R. (2006). Senescent birds redouble  
647 reproductive effort when ill: confirmation of the terminal investment hypothesis.  
648 *Proceedings. Biological Sciences / The Royal Society*, 273(1593), 1443–1448. doi:  
649 10.1098/rspb.2006.3480
- 650 Wang, G., Cai, W., Gan, B., Wu, L., Santoso, A., Lin, X., ... McPhaden, M. J. (2017).  
651 Continued increase of extreme El Niño frequency long after 1.5 C warming  
652 stabilization. *Nature Climate Change*, 7(8), 568–572. doi: 10.1038/NCLIMATE3351
- 653 Wingfield, J. C., Ramos-Fernandez, G., Nuñez-de la Mora, A., & Drummond, H. (1999).  
654 The Effects of an “El Niño” Southern Oscillation Event on Reproduction in Male and  
655 Female Blue-Footed Boobies, *Sula nebouxii*. *General and Comparative*  
656 *Endocrinology*, 114(2), 163–172. doi: 10.1006/gcen.1998.7243
- 657 Zhang, W. F., & Zhao, Q. (2015). The quasi-periodicity of the annual-cycle forced ENSO  
658 recharge oscillator model. *Communications in Nonlinear Science and Numerical*  
659 *Simulation*, 22(1–3), 472–477. doi: 10.1016/j.cnsns.2014.08.013
- 660 Zuur, A. F., Ieno, E. N., & Elphick, C. S. (2010). A protocol for data exploration to avoid  
661 common statistical problems. *Methods in Ecology and Evolution*, 1(1), 3–14. doi:  
662 10.1111/j.2041-210x.2009.00001.x
- 663
